# Supplementary material for: Inducing ring distortions in unsubstituted metallophthalocyanines using axial N-heterocyclic carbenes
Source: Royal Society of Chemistry journal article supplement (doi:10.1039/d4dt00528g), 2024-01-01
Supplement: d4dt00528g1.pdf [file d4dt00528g1.pdf]

## Electronic Supporting Information

# Inducing ring distortions in unsubstituted metallophthalocyanines using axial N-heterocyclic carbenes

Steven R. Kidd, Wen Zhou, Jeffrey J. Warren and Daniel B. Leznoff

Simon Fraser University, Department of Chemistry, 8888 University Drive Burnaby BC

V5A 1S6 Canada. Email: [dleznoff@sfu.ca](mailto:dleznoff@sfu.ca)

### Table of Contents

|                             |    |
|-----------------------------|----|
| UV-Vis Spectra.....         | 2  |
| NMR Spectra .....           | 6  |
| Crystallographic Data ..... | 10 |
| Solubility.....             | 13 |
| Computations .....          | 13 |

## UV-Vis Spectra

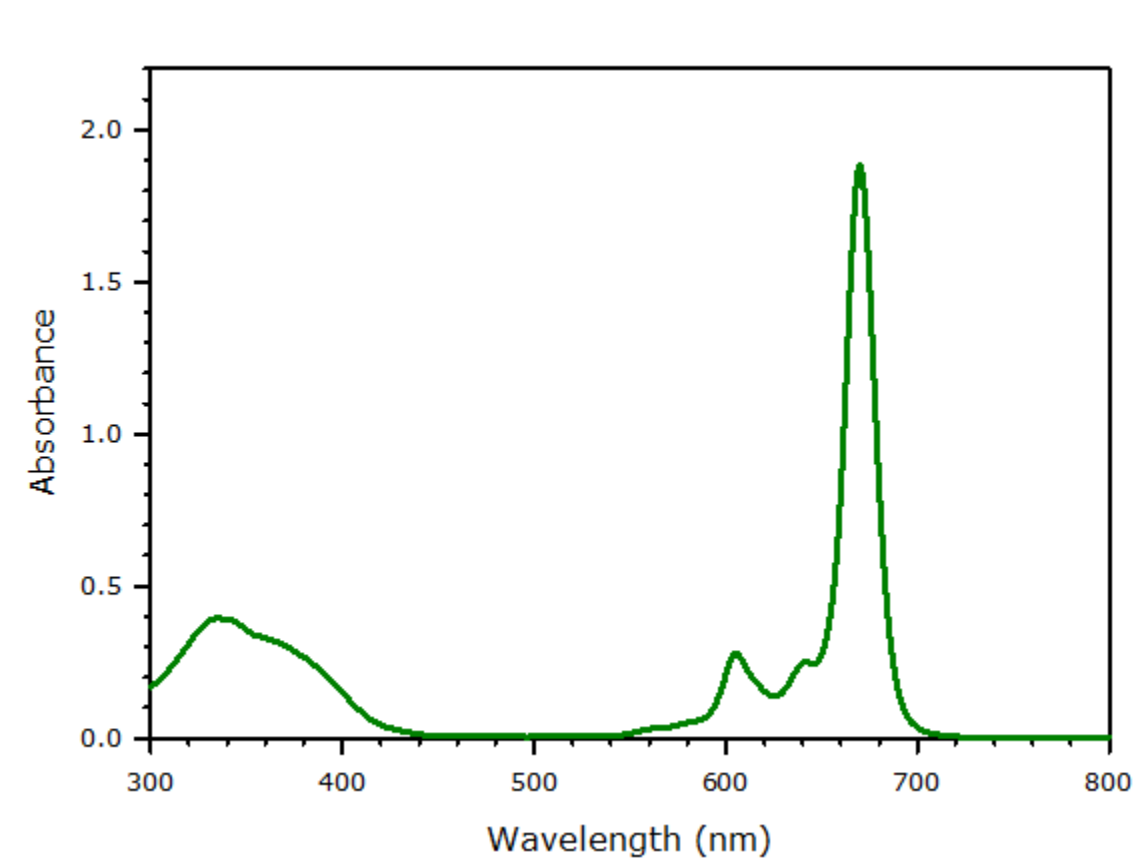

**Figure S1** UV-Vis spectrum of PcZn<sup>II</sup>(DIP) in Toluene, acquired under an ambient atmosphere.

Q-band ( $\lambda$  max) 670 nm.

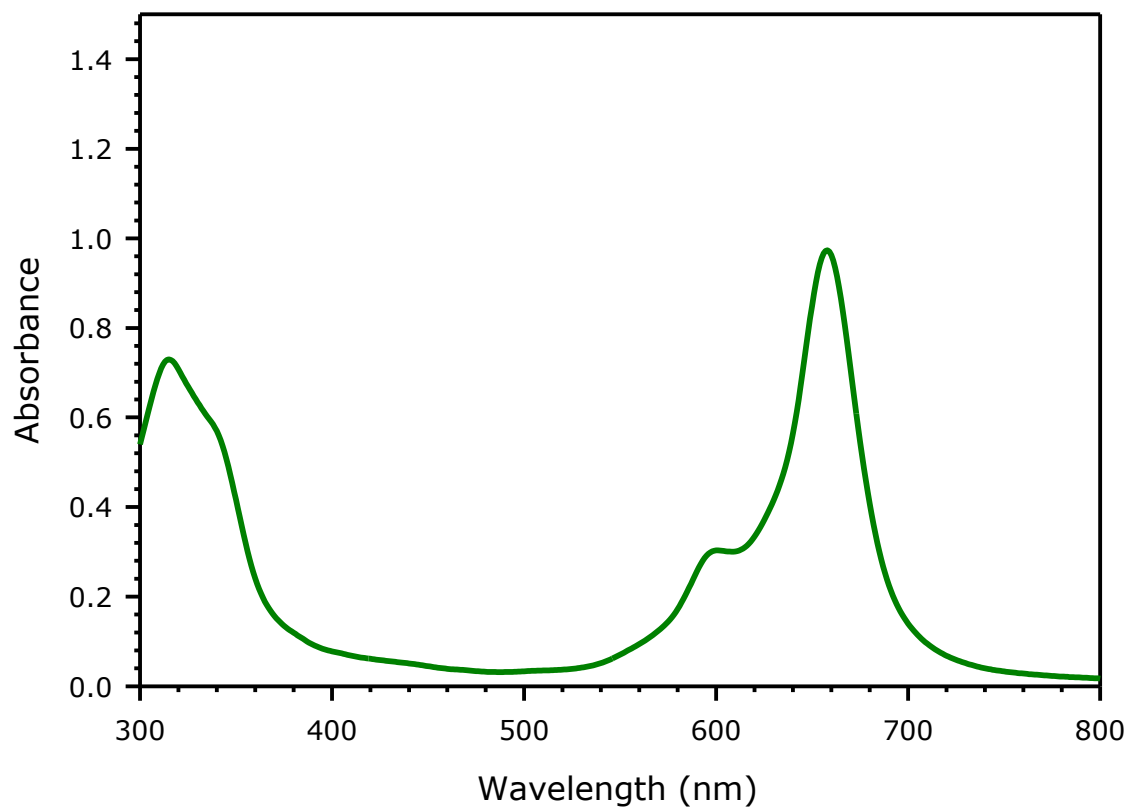

**Figure S2** UV-Vis spectrum of PcCo<sup>II</sup>(DIP) in Toluene, acquired in the presence of air. Q-band ( $\lambda$  max) 658 nm.

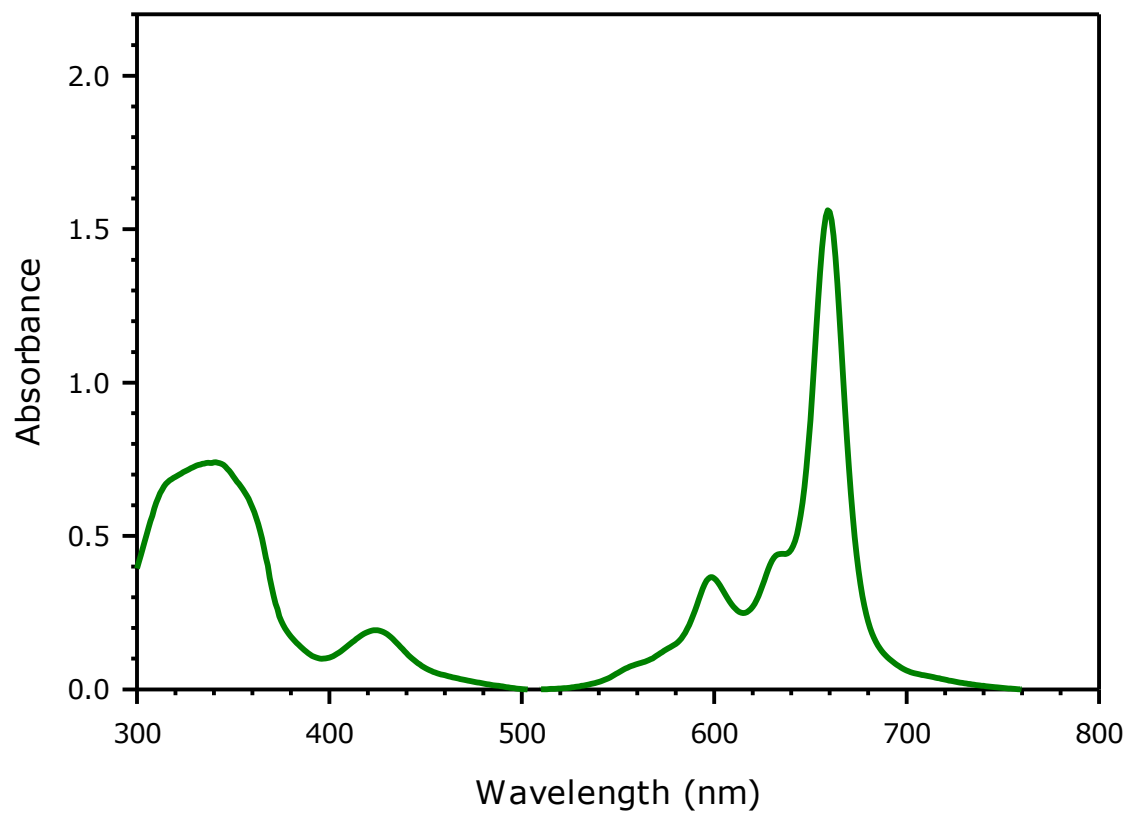

**Figure S3** UV-Vis spectrum of PcFe<sup>II</sup>(DIP)<sub>2</sub> in Toluene, acquired under an inert atmosphere. Q-band ( $\lambda$  max) 659 nm.

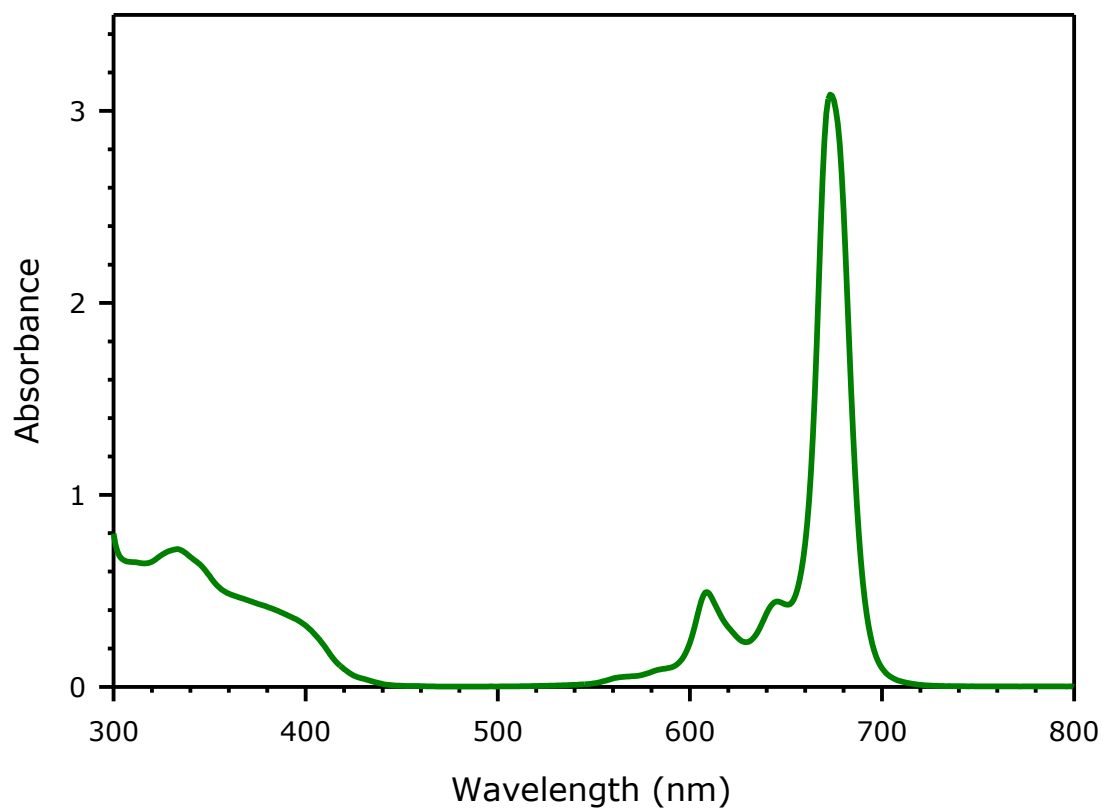

**Figure S4** UV-Vis spectrum of PcZn<sup>II</sup>(DMB) in Toluene, acquired in the presence of air. Q-band ( $\lambda$  max) 673 nm.

## NMR Spectra

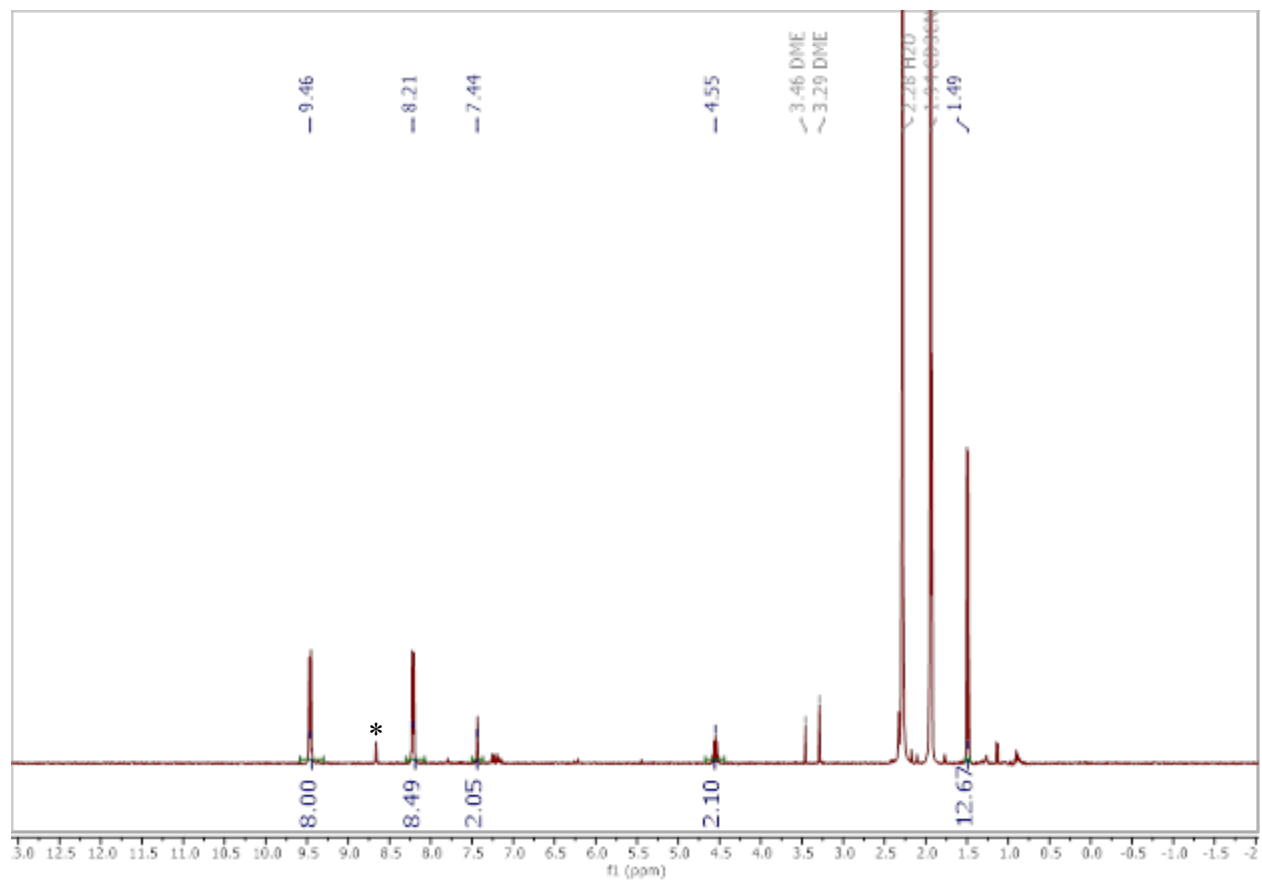

**Figure S5**  $^1\text{H}$  NMR spectrum of  $\text{PcZn}^{\text{II}}(\text{DIP})$  ( $\text{CD}_3\text{CN}$ , 400 MHz spectrometer). \* Impurity from DIP-based reagent.

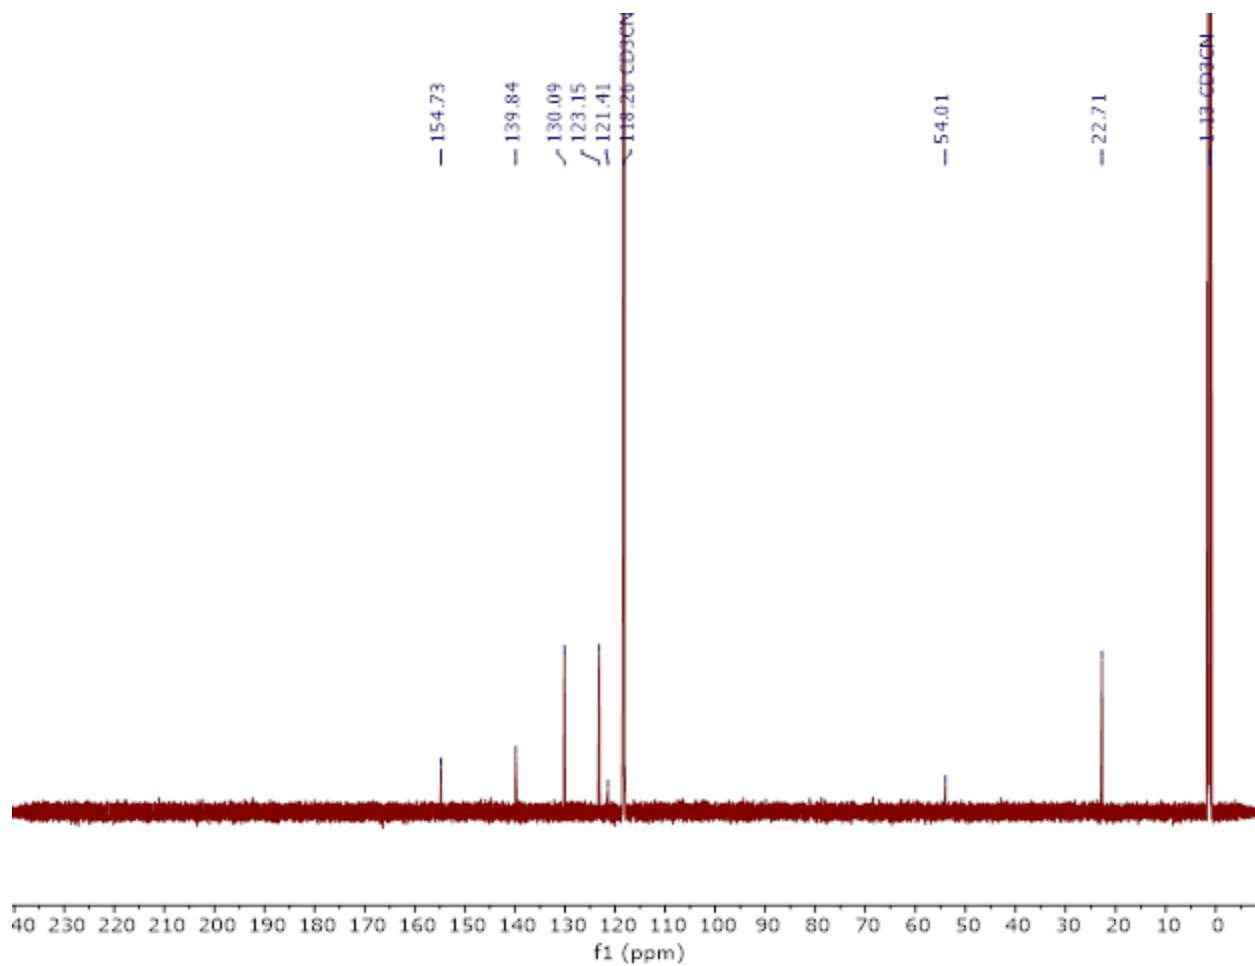

**Figure S6**  $^{13}\text{C}$  NMR spectrum of  $\text{PcZn}^{\text{II}}(\text{DIP})$  ( $\text{CD}_3\text{CN}$ , 125 MHz spectrometer).

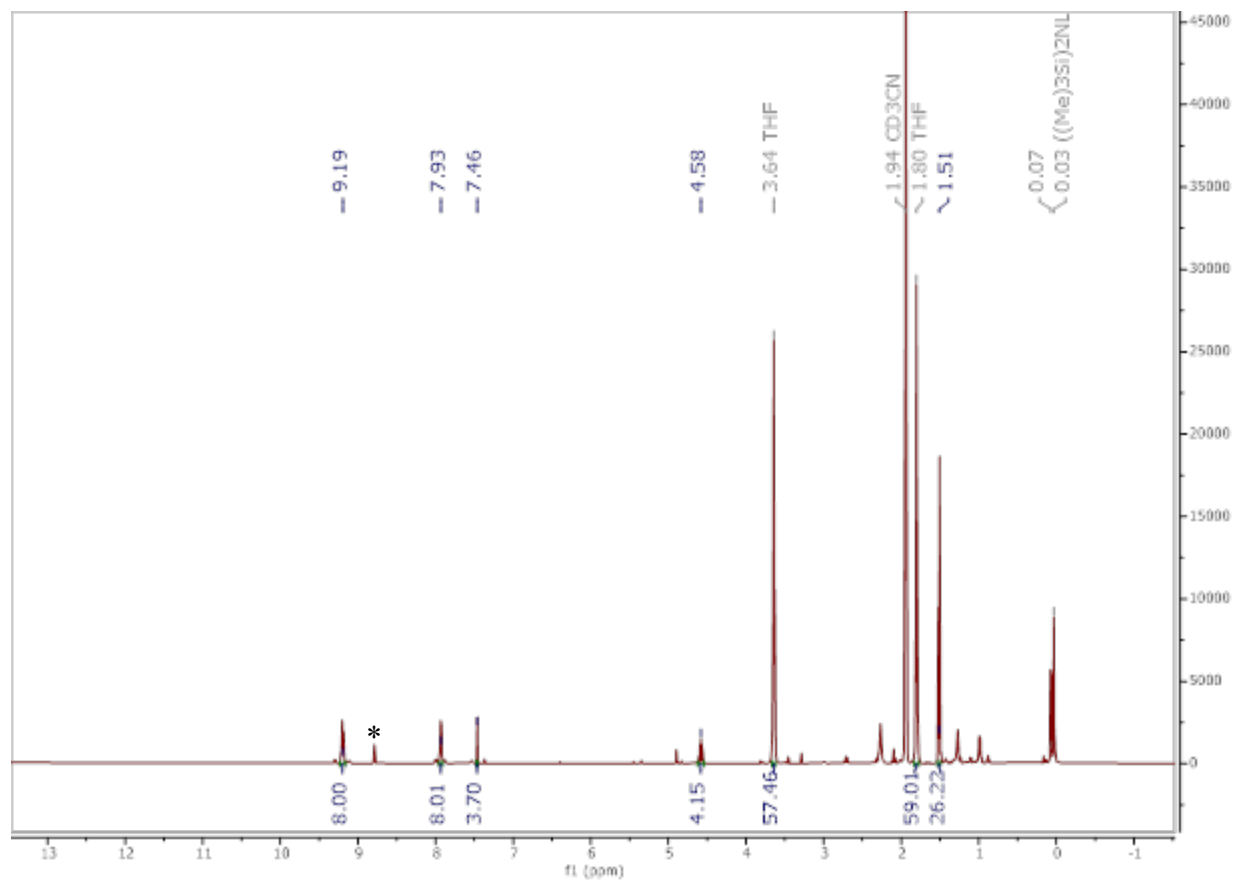

**Figure S7**  $^1\text{H}$  NMR spectrum of  $\text{PcFe}^{\text{II}}(\text{DIP})_2$  ( $\text{CD}_3\text{CN}$ , 500 MHz spectrometer). \* Impurity from DIP-based reagent.



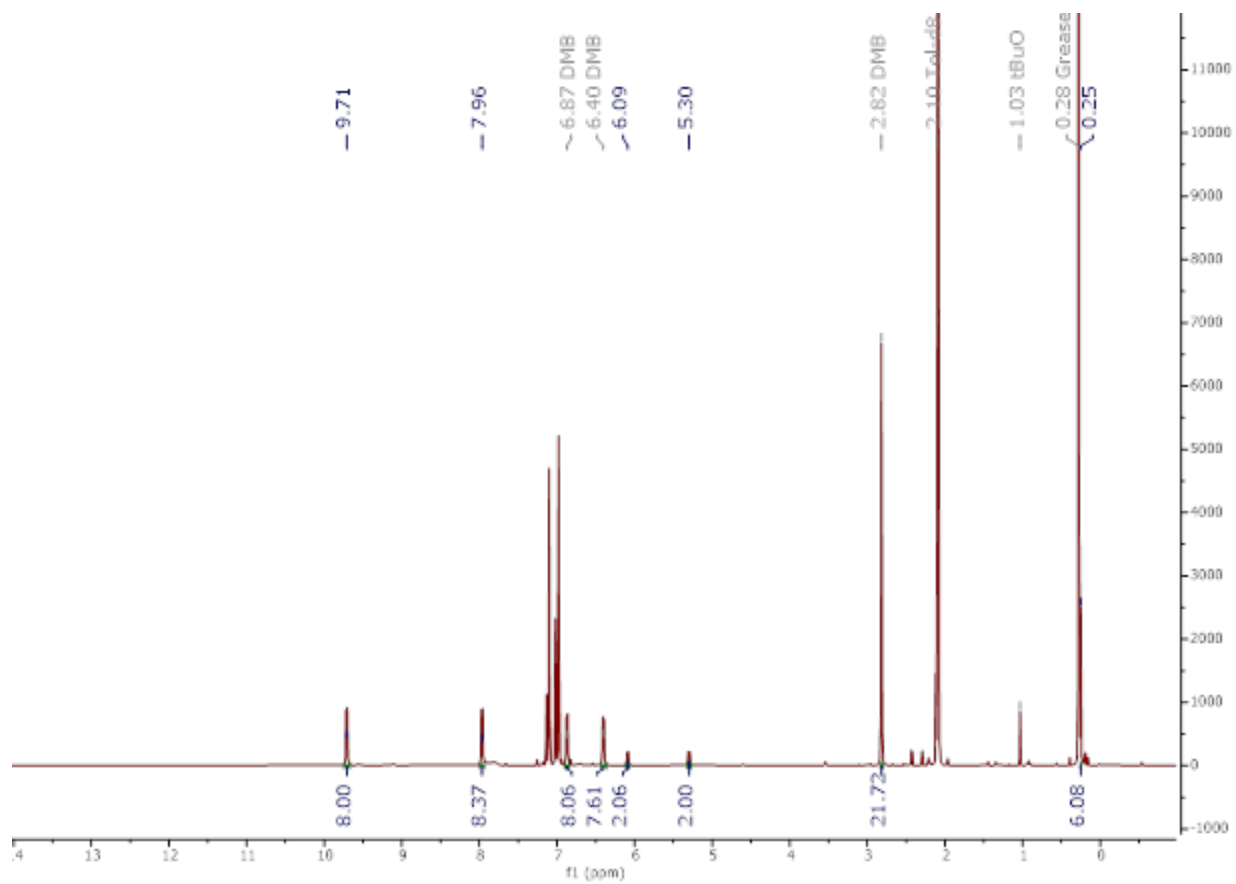

**Figure S8** <sup>1</sup>H NMR spectrum of PcZn<sup>II</sup>(DMB) (C<sub>7</sub>D<sub>8</sub>, 500 MHz spectrometer).

## Crystallographic Data

**Table S1** Summary of X-Ray crystal structures for PcM(NHC)<sub>x</sub> complexes.

| Parameter                            | PcZn <sup>II</sup> (DIP)                           | PcCo <sup>II</sup> (DIP)                           | PcFe <sup>II</sup> (DIP) <sub>2</sub>              | PcZn <sup>II</sup> (DMB)                           |
|--------------------------------------|----------------------------------------------------|----------------------------------------------------|----------------------------------------------------|----------------------------------------------------|
| Chemical Formula                     | C <sub>41</sub> H <sub>32</sub> N <sub>10</sub> Zn | C <sub>41</sub> H <sub>32</sub> N <sub>10</sub> Co | C <sub>50</sub> H <sub>48</sub> N <sub>12</sub> Fe | C <sub>41</sub> H <sub>26</sub> N <sub>10</sub> Zn |
| Formal Weight (g mol <sup>-1</sup> ) | 1643.53                                            | 1610.57                                            | 1149.25                                            | 908.35                                             |
| Crystal System                       | Monoclinic                                         | Monoclinic                                         | Monoclinic                                         | Monoclinic                                         |
| Space Group                          | C 2/c                                              | C 2/c                                              | P 2 <sub>1</sub> /c                                | P 2 <sub>1</sub> /c                                |
| a (Å)                                | 30.9681(19)                                        | 30.898(3)                                          | 16.3865(15)                                        | 12.0211(4)                                         |
| b (Å)                                | 14.0317(8)                                         | 13.5615(12)                                        | 19.1511(16)                                        | 15.8643(6)                                         |
| c (Å)                                | 20.7176(13)                                        | 21.2563(19)                                        | 19.3050(17)                                        | 23.5955(9)                                         |
| α (°)                                | 90                                                 | 90                                                 | 90                                                 | 90                                                 |
| β (°)                                | 118.052(3)                                         | 117.385(4)                                         | 90.504(5)                                          | 91.751(2)                                          |
| γ (°)                                | 90                                                 | 90                                                 | 90                                                 | 90                                                 |
| V (Å <sup>3</sup> )                  | 7944.9(9)                                          | 7908.8(12)                                         | 6058.0(9)                                          | 4497.7(3)                                          |
| Z                                    | 4                                                  | 4                                                  | 4                                                  | 4                                                  |
| T (K)                                | 189.98                                             | 189.99                                             | 190.00                                             | 189.99                                             |
| ρ (g cm <sup>-3</sup> )              | 1.374                                              | 1.353                                              | 1.260                                              | 1.341                                              |
| μ (mm <sup>-1</sup> )                | 1.245                                              | 3.786                                              | 2.410                                              | 1.155                                              |
| Reflections                          | 50962                                              | 40369                                              | 99114                                              | 74613                                              |
| R [I ≥ 2σ (I)]                       | 0.0551                                             | 0.0495                                             | 0.0723                                             | 0.0447                                             |
| R <sub>w</sub> [I ≥ 2σ (I)]          | 0.1239                                             | 0.1221                                             | 0.1824                                             | 0.1083                                             |
| Goodness of Fit                      | 1.037                                              | 1.061                                              | 1.050                                              | 1.058                                              |

**Table S2** Selected bond lengths and torsion angles for  $\text{PcM}^{\text{II}}(\text{NHC})_x$  complexes. The torsion angles are defined as follows: The isoindole angle is the dihedral angle between two adjacent isoindole subunits, the N-isoindole angle is the angle between the intersection of the  $\text{PcN}_4$  plane and the isoindole plane, and the  $\text{N}_{\text{meso}}$  angle is the dihedral angle between two pairs of  $\text{N}_{\text{meso}}$  atoms.

| Bond                                               | $\text{PcFe}^{\text{II}}(\text{DIP})_2$ | $\text{PcCo}^{\text{II}}(\text{DIP})$ | $\text{PcZn}^{\text{II}}(\text{DIP})$ | $\text{PcZn}^{\text{II}}(\text{DMB})$ |
|----------------------------------------------------|-----------------------------------------|---------------------------------------|---------------------------------------|---------------------------------------|
| M-C (Å)                                            | 2.164(3)                                | 2.265(3)                              | 2.094(4)                              | 2.093(3)                              |
| M-N (Å)                                            | 1.910(3)                                | 1.935(2)                              | 2.081(3)                              | 2.080(2)                              |
| M-N (Å)                                            | 1.914(3)                                | 1.936(2)                              | 2.089(3)                              | 2.087(2)                              |
| M-N (Å)                                            | 1.902(3)                                | 1.925(3)                              | 2.082(3)                              | 2.089(2)                              |
| M-N (Å)                                            | 1.906(2)                                | 1.924(3)                              | 2.084(4)                              | 2.083(2)                              |
| $\text{N}_{\text{M}}-\text{N}_{\text{M}}$ (Å)      | 3.824(4)                                | 3.838(3)                              | 3.939(4)                              | 3.951(3)                              |
| $\text{N}_{\text{M}}-\text{N}_{\text{M}}$ (Å)      | 3.807(3)                                | 3.826(4)                              | 3.950(4)                              | 3.961(3)                              |
| $\text{C}_{\text{NHC}}-\text{N}_{\text{meso}}$ (Å) | 3.362(4)                                | 3.340(4)                              | 3.340(4)                              | 3.480(4)                              |
| $\text{C}_{\text{NHC}}-\text{N}_{\text{meso}}$ (Å) | 3.305(4)                                | 3.346(5)                              | 3.346(5)                              | 3.601(4)                              |
| $\text{C}_{\text{NHC}}-\text{N}_{\text{meso}}$ (Å) | 3.323(4)                                | -                                     | -                                     | -                                     |
| $\text{C}_{\text{NHC}}-\text{N}_{\text{meso}}$ (Å) | 3.330(4)                                | -                                     | -                                     | -                                     |
| Isoindole (°)                                      | 5.2(4)                                  | -3.1(4)                               | -6.3(4)                               | 3.0(3)                                |
| Isoindole (°)                                      | -7.2(4)                                 | -1.3(4)                               | -3.9(4)                               | -1.6(3)                               |
| Isoindole (°)                                      | -5.8(4)                                 | 4.3(4)                                | 5.6(5)                                | -4.5(3)                               |
| Isoindole (°)                                      | 9.1(4)                                  | 3.1(4)                                | 7.2(4)                                | 2.4(3)                                |
| N-Isoindole (°)                                    | 13.6(2)                                 | 2.4(2)                                | -0.7(7)                               | -1.3(1)                               |
| N-Isoindole (°)                                    | 9.5(1)                                  | 1.7(2)                                | 6.0(3)                                | -3.6(2)                               |
| N-Isoindole (°)                                    | 12.2(1)                                 | 3.6(3)                                | -0.1(3)                               | 0.5(2)                                |
| N-Isoindole (°)                                    | 15.8(2)                                 | -8.7(2)                               | -5.8(3)                               | -2.7(2)                               |
| $\text{N}_{\text{meso}}$ (°)                       | 23.77(6)                                | 6.55(6)                               | 0.41(7)                               | -3.74(5)                              |

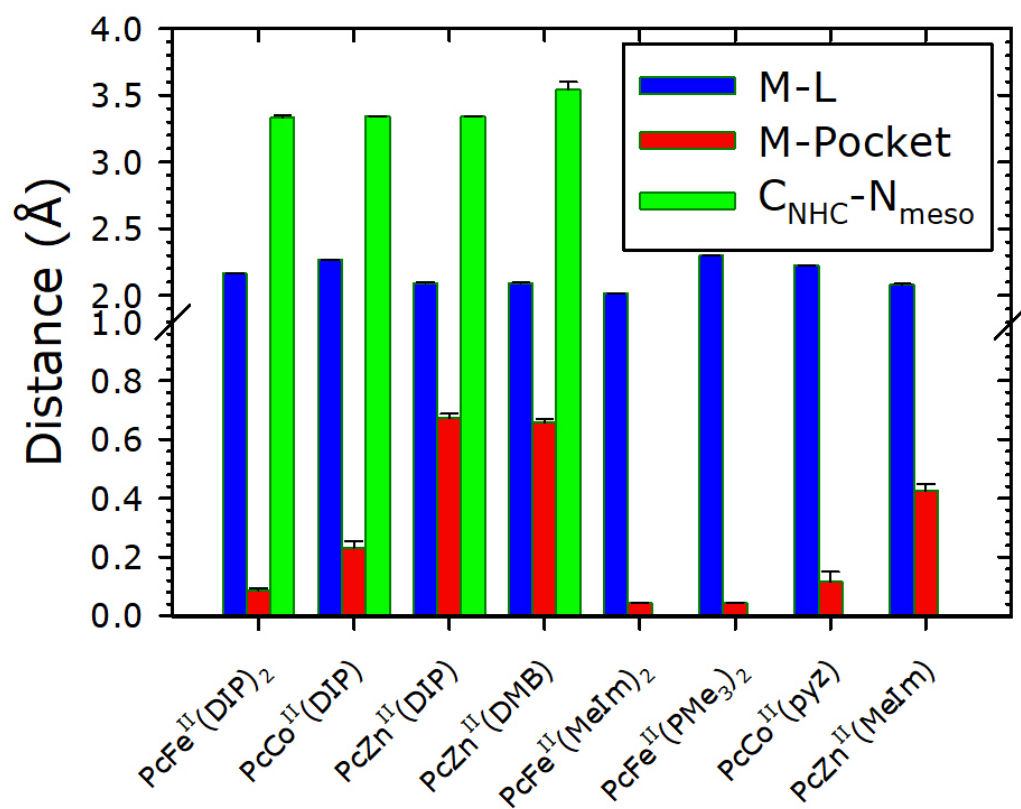

**Figure S9** Summary of the crystallographic distances of interest for the PcM(NHC)<sub>x</sub> complexes as well as selected literature complexes for reference.

## Solubility

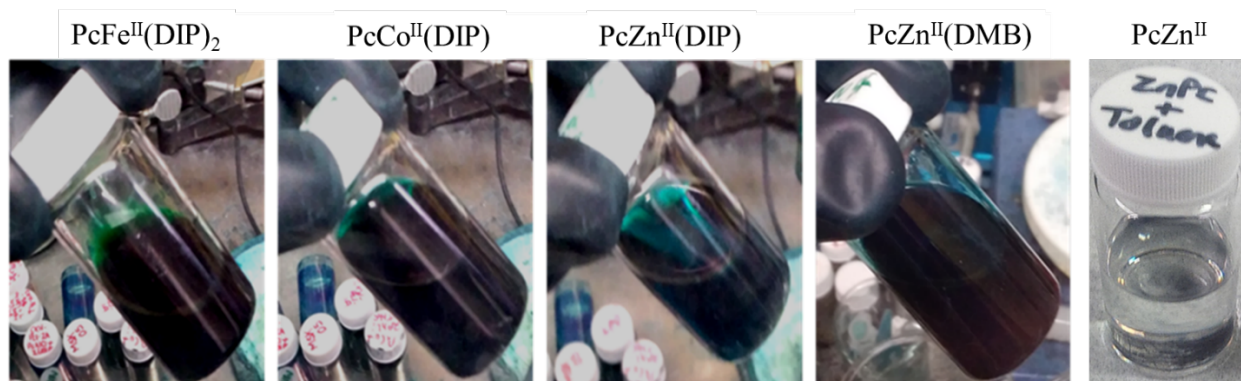

**Figure S10** PcM<sup>II</sup>(DIP/DMB) reaction photos after filtering through Celite in toluene and the insoluble PcZn<sup>II</sup> starting material in toluene (far right).

## Computations

Bond dissociation energies were calculated by subtracting the single point energy ( $E$ ) of the products from the reactants, after taking into account the zero point energy ( $E_Z$ ), thermal energy ( $E_T$ ), and entropic energy ( $S$ ) corrections of the product from the reactants.

$$BDE = (E + E_Z + E_T - S)_{Prod} - (E + E_Z + E_T - S)_{React} \quad (\text{Eq. S1})$$

**Table S3** Correlation between BDE and organometallic CBC model for PcM<sup>II</sup>(NHC)<sub>x</sub> complexes.

| Complex                               | M-C               |                                                  |
|---------------------------------------|-------------------|--------------------------------------------------|
|                                       | BDE<br>(kcal/mol) | CBC/ e <sup>-</sup> #                            |
| PcFe <sup>II</sup> (DIP) <sub>2</sub> | 6.5               | ML <sub>4</sub> X <sub>2</sub> 18 e <sup>-</sup> |
| PcCo <sup>II</sup> (DIP)              | 4.1               | ML <sub>3</sub> X <sub>2</sub> 17 e <sup>-</sup> |
| PcZn <sup>II</sup> (DIP)              | -1.4              | ML <sub>3</sub> X <sub>2</sub> 20 e <sup>-</sup> |
| PcZn <sup>II</sup> (DMB)              | 0.2               | ML <sub>3</sub> X <sub>2</sub> 20 e <sup>-</sup> |
